## **Recovery-associated resting-state activity and connectivity alterations in Anorexia nervosa**

Leon D. Lotter<sup>1,2,3</sup>, Georg von Polier<sup>2,3,4</sup>, Jan Offermann<sup>1</sup>, Kimberly Buettgen<sup>4</sup>, Lukas Stanetzky<sup>4</sup>, Simon B. Eickhoff<sup>2,3</sup>, Kerstin Konrad<sup>1,5</sup>, Jochen Seitz\*<sup>4</sup>, Juergen Dukart\*<sup>2,3</sup>

\*contributed equally

<sup>1</sup>Child Neuropsychology Section, Department of Child and Adolescent Psychiatry, Psychosomatics and Psychotherapy, University Hospital RWTH Aachen, Germany

<sup>2</sup>Institute of Neuroscience and Medicine, Brain & Behaviour (INM-7), Research Centre Jülich, Jülich, Germany

<sup>3</sup>Institute of Systems Neuroscience, Medical Faculty, Heinrich Heine University Düsseldorf, Düsseldorf, Germany

<sup>4</sup>Department of Child and Adolescent Psychiatry, Psychosomatics and Psychotherapy, University Hospital RWTH Aachen, Germany

<sup>5</sup>JARA-Brain Institute II, Molecular Neuroscience and Neuroimaging, Research Center Jülich, Jülich, Germany

### **Correspondence to** Leon David Lotter

Child Neuropsychology Section, Department of Child and Adolescent Psychiatry, Psychosomatics and Psychotherapy, University Hospital RWTH Aachen  
Neuenhofer Weg 21, 52074, Aachen, Germany

Email: [leon.lotter@rwth-aachen.de](mailto:leon.lotter@rwth-aachen.de); ORCID-iD: 0000-0002-2337-6073

Mobile: +49 (0) 176 473 00 350

## Abstract

Previous studies provided controversial insight on the impact of starvation, disease status and underlying grey matter volume changes on functional brain resting-state alterations in anorexia nervosa (AN). Here we disentangle the effects of these factors on resting-state alterations in AN. The study sample ( $N = 87$ , all female) consisted of 22 adolescent patients with acute AN (mean age 15.3 years) scanned at inpatient admission and at discharge ( $N = 21$ ), 21 patients recovered from AN (22.3 years) and two groups of healthy age-matched controls (both  $N = 22$ , 16.0 and 22.5 years). Multimodal whole-brain analyses revealed grey matter volume independent reductions of resting-state functional connectivity and activity in patients with acute AN in prefrontal, sensorimotor, parietal, temporal, precuneal and insular brain regions. All alterations were largely normalized in short- and absent in long-term recovered AN without evidence for possible preexisting trait- or remaining “scar”-effects, compatible with starvation-related phenomena.

## 15 Introduction

Anorexia nervosa (AN) is a serious eating disorder, typically occurring in females during puberty. It is characterized by a self-induced restriction of food intake and an intense fear of gaining weight, accompanied by a disturbed perception of one's own physical state (American Psychiatric Association, 2013). Whilst the current literature agrees on an extensive biological foundation underlying the disorder, its nature has not yet been fully understood (Zipfel et al., 2015).

Resting-state functional magnetic resonance imaging (rsfMRI) (Damoiseaux et al., 2006) provides important insights into organization and alteration of functional brain networks. In contrast to task-based fMRI, rsfMRI is relatively simple to perform, easily scalable and able to capture information on the brain-network level independent of individual compliance and performance, thus promising to extend the current knowledge on neural alterations in AN (Fox & Greicius, 2010). Previous rsfMRI research in AN led to a variety of findings, encompassing alterations of inter- as well as intraregional functional connectivity (FC) and activity in executive control, default mode, visual and sensorimotor networks as well as prefrontal and insular cortices (Gaudio et al., 2016; Steward et al., 2018; Seidel et al., 2019; Kullmann et al., 2014; Ehrlich et al., 2015; Gaudio et al., 2018). These alterations may underlie AN-related phenomena such as excessive cognitive control, disintegration of sensory and interoceptive information and persistent rumination about topics related to bodyweight and -shape (Gaudio et al., 2016).

The often severe starvation which patients experience in the acute state of AN can cause various somatic and psychiatric symptoms, that are not necessarily a specific product of the disorder but of starvation in general (Zipfel et al., 2015). The physical adaptation to starvation may be partly regulated by leptin, a hormone influencing various

endocrine pathways (Hebebrand et al., 2007). As was shown for grey matter volume  
40 (GMV) during different weight-recovery states of AN (Seitz et al., 2014, 2016), causes and  
consequences of undernutrition can influence resting-state brain functioning (Al-Zubaidi  
et al., 2018, 2020). Longitudinal studies are crucial to better understand the development  
of rsfMRI alterations during the clinical course of AN and to disentangle the contribution  
of starvation and weight restoration from potential specific AN traits. Only two studies to  
45 date adapted such a longitudinal design providing controversial results on FC alterations  
(Cha et al., 2016; Uniacke et al., 2019). Whilst Cha et al. reported FC differences to  
disappear after short-term weight restoration, Uniacke et al. found some evidence for  
persistent FC alterations. In line with the latter, alterations in executive control (Boehm  
et al., 2016), default mode (Cowdrey et al., 2014) and visual networks (Favaro et al., 2012;  
50 Scaife et al., 2017) were reported in long-term recovered patients. However, these  
findings were not consistently replicated (Gaudio et al., 2016; Steward et al., 2018) and  
may additionally have been confounded by differences in underlying grey matter (Dukart  
et al., 2017). To date, due to widespread and inconsistent findings obtained by a variety  
of data analytic methods with mostly cross-sectional approaches, the question on the  
55 nature (e.g. relation between intra- and interregional FC alterations), confounds (e.g.  
influence of GMV changes) and state- or trait-dependency (influence of acute  
malnutrition) of rsfMRI alterations in AN remains open.

To address these questions, we examine rsfMRI data in patients in the underweight,  
short-term weight-restored and long-term recovered state of AN. Given the widespread  
60 nature of previous findings, we follow a data-driven approach testing for alterations of  
whole-brain functional connectivity and activity by utilizing Network Based Statistics  
(Zalesky et al., 2010), Global Correlation (Whitfield-Gabrieli & Nieto-Castanon, 2012),  
Integrated Local Correlation (Deshpande et al., 2009) and the fractional Amplitude of Low

Frequency Fluctuations (Zou et al., 2008). We further evaluate if rsfMRI alterations persist  
65 when controlling for underlying GMV. Using this integrative approach, we aim to provide  
valuable insights into the development of resting-state alterations over the clinical course  
of AN.

## Materials and Methods

### 70 Participants

In total, 87 women underwent rsfMRI scanning in two separate cohorts (Table 1; tables S1-3). The first cohort (“acu”) comprised 22 adolescent inpatients with AN ( $N = 1$  binge eating/purging subtype) who were scanned at admission (T1acu) and after discharge from treatment (T2acu,  $N = 21$ ) aside with 22 age-matched healthy controls (HCacu; scanned once). The second cohort (“rec”) consisted of 21 young adult patients recovered from adolescent-onset AN for at least 12 months (T3rec) and 22 age-matched HC (HCrec). Except for three patients with AN, the two cohorts comprised separate participants. To avoid any additional assumptions on the data, the cohorts were assumed independent. AN was diagnosed according to DSM-5 criteria (American Psychiatric Association, 2013) and all patients received inpatient treatment at the eating disorders (ED) unit of the Department of Child and Adolescent Psychiatry and Psychotherapy, University Hospital Aachen, Germany. For additional details on the study sample as well as recruitment and scanning procedure, see supplementary methods.

Both studies were approved by the local ethics committee (cohort 1: EK081/10, cohort 2: EK213/15) and were conducted in accordance with the Declaration of Helsinki. All participants and their legal guardians (if underage) gave written informed consent.

|                                                   | <u>T1acu (admission)</u>       | <u>T2acu (discharge)</u>       | <u>HCacu</u>                   | <u>T3rec (recovery)</u>        | <u>HCrec</u>                   |
|---------------------------------------------------|--------------------------------|--------------------------------|--------------------------------|--------------------------------|--------------------------------|
|                                                   | <i>N = 22</i>                  | <i>N = 21</i>                  | <i>N = 22</i>                  | <i>N = 21</i>                  | <i>N = 22</i>                  |
|                                                   | <i>mean ± SD (min. – max.)</i> | <i>mean ± SD (min. – max.)</i> | <i>mean ± SD (min. – max.)</i> | <i>mean ± SD (min. – max.)</i> | <i>mean ± SD (min. – max.)</i> |
| <b>General</b>                                    |                                |                                |                                |                                |                                |
| age (y)                                           | 15.3 ± 1.9 (10.2 – 18.6)       | 15.5 ± 2.0 (10.5 – 18.9)       | 16.0 ± 2.0 (12.8 – 19.2)       | 22.3 ± 3.3 (17.7 – 31.4)       | 22.5 ± 3.5 (16.6 – 31.3)       |
| verbal IQ                                         | 108.9 ± 17.0 (92 – 143)*       |                                | 98.0 ± 9.7 (82 – 124)          | 108.2 ± 9.5 (97 – 124)         | 110.9 ± 12.0 (95 – 130)        |
| <b>ED severity</b>                                |                                |                                |                                |                                |                                |
| BMI (kg/m <sup>2</sup> )                          | 15.7 ± 1.5 (13.1 – 18.3)*#     | 18.2 ± 1.2 (15.0 – 20.1)*      | 22.3 ± 2.1 (18.7 – 26)         | 21.8 ± 2.6 (18.6 – 26.6)       | 21.9 ± 2.0 (19.1 – 25.5)       |
| BMI-SDS                                           | -2.7 ± 1.4 (-5.5 – -1.0)*#     | -1.1 ± 0.4 (-1.9 – -0.5)*      | 0.3 ± 0.6 (-1.1 – 1.1)         | -0.3 ± 0.8 (-1.4 – 0.9)        | -0.2 ± 0.7 (-1.2 – 0.9)        |
| leptin (ng/ml)                                    | 2.0 ± 1.8 (0.9 – 6.9)*#        | 6.0 ± 3.9 (0.9 – 14)*          | 20.0 ± 12.0 (6.6 – 48)         | 12.6 ± 7.2 (3.7 – 26)          | 11.1 ± 6.4 (2.8 – 25.6)        |
| <b>ED history</b>                                 |                                |                                |                                |                                |                                |
| age at ED onset (y)                               | 13.9 ± 1.9 (9.1 – 17.9)        |                                |                                | 14.4 ± 1.6 (11.8 – 17.6)       |                                |
| age at (first) adm. (y)                           | 15.2 ± 2 (10.2 – 18.6)         |                                |                                | 15.2 ± 1.6 (12.0 – 18.4)       |                                |
| BMI at adm./dis. (kg/m <sup>2</sup> )             | 15.3 ± 1.3 (12.6 – 18.4)       | 18.4 ± 1.2 (15.5 – 20.2)       |                                | 15.7 ± 2.1 (11.3 – 21.3)       |                                |
| BMI-SDS at adm./dis.                              | -2.9 ± 1.2 (-5 – -1.4)         | -1.0 ± 0.4 (-1.8 – -0.5)       |                                | -2.7 ± 1.5 (-6.2 – -0.2)       |                                |
| time from T1 to T2 (d)                            |                                | 90.8 ± 40.8 (41 – 183)         |                                |                                |                                |
| ED duration (y)                                   | 1.6 ± 1.3 (0.5 – 4.8)          |                                |                                | 2.0 ± 1.7 (0.1 – 7.1)          |                                |
| recovery duration (y)                             |                                |                                |                                | 5.3 ± 3.0 (1.5 – 13.2)         |                                |
| time from adm. to T1/<br>time from T2 to dis. (d) | 19.6 ± 12.3 (4 – 60)           | 8.1 ± 26.1 (-52 – 52)          |                                |                                |                                |
| <b>Symptom scales</b>                             |                                |                                |                                |                                |                                |
| EDE - mean total score                            | 3.8 ± 1.2 (1.6 – 5.7)#         | 2.0 ± 1.1 (0.3 – 4.4)          |                                | 1.0 ± 1.0 (0.1 – 3.7)          |                                |
| EDI-2 - total score                               | 271.5 ± 80.1 (109 – 436)*      | 252.5 ± 58.9 (106 – 335)*      | 187.4 ± 31.9 (115 – 240)       | 259.8 ± 73.2 (175 – 399)*      | 194.6 ± 32.8 (151 – 263)       |
| BDI-2 - total score                               | 18.4 ± 13.6 (0 – 38)*          | 13.5 ± 14.2 (0 – 51)*          | 3.1 ± 2.7 (0 – 10)             | 10.7 ± 11.5 (0 – 37)*          | 3.9 ± 3.9 (0 – 12)             |

**Table 1: Demographic and clinical sample characteristics**

\* Significant difference compared to HC (T1acu/T2acu vs. HCacu or T3rec vs. HCrec). #Significant difference compared to T2acu.  $\alpha = 0.05$ ,  $p$  uncorrected. For detailed results of statistical comparisons see supplementary tables S1 and S2, for additional sample information table S3.

SD = standard deviation; IQ = intelligence quotient; ED = eating disorder; BMI(-SDS) = body mass index (- standard deviation score); adm. = admission; dis. = discharge; treatment duration = time from admission to discharge; ED duration = time from symptom onset to last discharge (if symptom onset not available, from first admission); recovery duration = time from last inpatient discharge or last underweight state to examination; EDE = Eating Disorder Examination; EDI-2 = Eating Disorder Inventory 2; BDI-2 = Beck Depression Inventory 2. Missing data: T1acu: verbal IQ:  $N = 6$ , EDE:  $N = 3$ , EDI-2:  $N = 1$ , BDI-2:  $N = 3$ . T2acu: leptin:  $N = 1$ , EDE:  $N = 3$ , EDI-2:  $N = 4$ , BDI-2:  $N = 3$ . T3rec: age at ED onset:  $N = 12$ , BMI-SDS at first admission:  $N = 1$ . HCrec: verbal IQ:  $N = 1$ , EDI-2:  $N = 2$ , BDI-2:  $N = 1$ .

## Clinical Assessments

Current eating disorder diagnosis and severity were examined using the Eating Disorder Examination (EDE) (Hilbert et al., 2004) and the Eating Disorder Inventory Revised (EDI-2; 6-point-scale, 11 subscales) (Paul & Thiel, 2005). Undernutrition was quantified by age- and sex-adjusted BMI standard deviation scores (BMI-SDS) (Hemmelmann et al., 2010; Neuhauser et al., 2013) and plasma leptin. The sex-adjustment of BMI scores was relevant to evaluating the nominal underweight of the participants (see supplementary methods).

Depressive symptoms were assessed with the Beck Depression Inventory (Hautzinger et al., 2009). Screening for psychiatric comorbidities was conducted using the Kiddie Schedule for Affective Disorders and Schizophrenia (German K-SADS-Workgroup, 2001) or the Mini International Neuropsychiatric Interview (Ackenheil et al., 1999). The Multiple-choice Vocabulary Test (Lehrl, 2005) was utilized to approximate verbal intelligence quotient (IQ). Further information on psychopathology and past inpatient treatments were obtained from clinical records. Interviews were conducted by specifically trained and supervised clinical researchers with background in medicine or psychology.

## MRI Data Acquisition

All participants were scanned at the same 3T MRI scanner (Magnetom Prisma; Siemens, Erlangen, Germany). Structural T1-weighted images were acquired using a Rapid Acquisition Gradient Echo (MP-RAGE) sequence with following parameters: cohort 1: TR = 1880 ms, TE = 3.03 ms, Field of View (FoV) = 256 x 256 mm; cohort 2: TR = 2300 ms, TE = 2.98 ms, FoV = 256 x 240 mm; both cohorts: number of slices = 176, voxel size = 1 x 1 x 1 mm<sup>3</sup>. For rsfMRI, all probands underwent a 7 minutes eyes closed T2\*-weighted gradient-echo Echo Planar Imaging (EPI) protocol with TR = 2000 ms, TE = 28 ms, flip-



angle = 77°, FoV = 192 x 192 mm, number of slices = 34, number of volumes = 210, voxel-size = 3 x 3 x 3.5 mm<sup>3</sup>. All subjects in cohort 1 (patients and HC) were scanned during daytime while continuing their usual food intake or refeeding plans, all subjects in cohort 115 2 were scanned in the morning after an overnight fasting.

## Preprocessing

Preprocessing of functional and structural images was conducted with the Statistical Parametric Mapping software (SPM12; <https://www.fil.ion.ucl.ac.uk/spm/>) in a MATLAB environment (R2018a; the MathWorks, Inc.). For further processing and analyses of 120 rsfMRI data the CONN toolbox (version 18b; Whitfield-Gabrieli & Nieto-Castanon, 2012) was used.

Preprocessing included removal of the first four frames, realignment for motion correction and co-registration to structural images with subsequent spatial normalization into Montreal Neurological Institute space using parameters derived from structural data 125 and interpolation of the data to a 3 mm isotropic resolution. The normalization parameters were also applied (with modulation) to segmented grey matter probability maps to obtain corresponding voxel-wise GMV. A grey matter mask (probability of grey matter > 0.2) was applied to all images to restrict analyses to grey matter tissue. A Gaussian smoothing kernel of 6 mm full-width at half maximum (FWHM) was applied to 130 rsfMRI data. Twenty-four motion parameters (Friston et al., 1996) aside with mean white matter and cerebrospinal fluid signals were regressed out of the functional data. The resulting images were linearly detrended and temporally band-pass-filtered (0.01 to 0.08 Hz). One HCacu had to be excluded from analysis because of data processing errors. Groups did not differ in regard to mean frame wise displacement (FWD) and no subject 135 exceeded a maximum FWD (translation) of 3 mm (table S4).

## **Analyses of demographic and clinical data**

Statistical analyses of demographic and clinical data were conducted using the R-based software *jamovi* (The jamovi project, 2020). *T*-, Mann-Whitney-*U*- or Wilcoxon-tests were used as appropriate to compare characteristics between groups.

### **140 Primary analyses of rsfMRI data**

Primary rsfMRI analyses consisted of (1) calculation of resting-state FC and activity measures based on whole-brain voxel-wise data and (2) a parcellation-based approach applying Network-Based Statistics (NBS) (Zalesky et al., 2010). The derived measures were compared between AN- and corresponding HC-groups (T1acu vs. HCacu, T2acu vs. 145 HCacu, T3rec vs. HCreC) and between T1acu and T2acu to assess temporal evolution of rsfMRI alterations in the acute-recovery phase. Additionally, an “interaction” design including acute and recovered patients and corresponding control groups was applied testing for group-by-time interactions between patients at admission and in long-term recovery. Extraction of voxel-wise rsfMRI measures and calculation as well as 150 visualization of NBS results were conducted using the CONN toolbox.

Global Correlation (GC) was calculated as the average of bivariate correlations between the Blood oxygenation level dependent (BOLD) signal of a given voxel and every other voxel (Whitfield-Gabrieli & Nieto-Castanon, 2012). Integrated Local Correlation (LC) was computed as the average bivariate correlation between each voxel and its 155 neighboring voxels weighted by a Gaussian convolution with 6 mm FWHM (Deshpande et al., 2009). Fractional Amplitude of Low Frequency Fluctuations (fALFF) was calculated at each voxel as the root mean square of the BOLD signal amplitude in the analysis frequency band (0.01 – 0.08 Hz) divided by the amplitude in the entire frequency band (Zou et al., 2008). Group comparisons were conducted using t-contrasts within general linear models

160 while controlling for age. Data from T1acu were compared to T2acu using a repeated  
measures design. An exact permutation based (1000 permutations) cluster threshold ( $p$   
< 0.05) was applied in all analyses combined with an uncorrected voxel-wise threshold of  
 $p < 0.01$  (Dukart et al., 2017) allowing for an accurate control of the false positive rate  
while maintaining sensitivity to potentially weak resting-state alterations (Eklund et al.,  
165 2016).

For NBS analyses, preprocessed functional images were (without smoothing)  
parcellated into 100 cortical (Schaefer et al., 2018) and 16 subcortical brain regions  
(Neuromorphometrics, Inc.). For reporting, Automated Anatomical Labeling atlas (Rolls  
et al., 2020) regions corresponding to the centroid coordinates of the Schaefer et al. -atlas  
170 were used. BOLD signal time courses were averaged within each region of interest (ROI).  
Subject-wise bivariate correlation matrices (116 x 116) were calculated and Fisher's  $z$ -  
transformed. Each ROI-to-ROI connection was compared between groups and resulting  
 $p$ -values were thresholded at an uncorrected level of  $p < 0.01$ . Within this set of supra-  
threshold connections, all possible connected (sub-)networks were identified. Using  
175 permutation testing (10000 iterations), resulting subnetworks were assessed for  
statistical significance based on their sizes while controlling the family-wise error rate  
(Zalesky et al., 2010).

In additional sensitivity analyses, contrasts yielding significant group differences  
were recomputed by including mean rotational and translational FWD as additional  
180 covariates to control for motion at the group level.

### **Post-hoc group comparisons**

Post-hoc comparisons of rsfMRI measures and correlation analyses were implemented  
using *jamovi* and visualized through the R-package *ggplot2* (Wickham, 2016). To better

understand group differences observed for NBS, FC of every connection included in  
185 significant NBS subnetworks was averaged for each subnetwork (separately for increased  
and decreased connections) and values of every voxel included in significant clusters  
were averaged per cluster. These measures representing whole networks or clusters,  
respectively, were used for further analyses. Age was controlled for in all post-hoc  
190 analyses. The correction for multiple comparisons inherent to the NBS procedure does  
not allow for inference about individual connections (Zalesky et al., 2010). To explore the  
neuroanatomy of the NBS results, the region with the strongest alteration in node degree  
(the region showing the largest number of altered connections) in each subnetwork was  
identified. Connections between these regions and any other ROI that showed significant  
differences (Bonferroni-corrected) between groups were identified by applying a seed-  
195 to-ROI approach.

To assess the temporal development of resting-state properties that were altered in  
acute AN, averaged values from the T1acu < HCacu and T1acu < T2acu contrasts were  
compared between AN and corresponding HC using analyses of covariance (ANCOVAs) or  
paired *t*-tests for each network or cluster. Bonferroni correction was applied to control  
200 for the number of tests per rsfMRI modality and contrast. In additional sensitivity  
analyses, we explored the effects of controlling for IQ, for time between inpatient  
admission and T1 (to control for delayed scanning) and for BMI-SDS as well as of  
excluding participants taking psychoactive medication. To evaluate the potential impact  
of outliers on rsfMRI group differences, we recalculated corresponding post-hoc group  
205 comparisons using non-parametric statistics (see supplementary methods and results).

## **Relationships among rsfMRI measures**

We further assessed how the different rsfMRI alterations identified in acute AN relate to each other. For this, Pearson correlations between all rsfMRI measures in AN at T1 as well as between changes in rsfMRI measures from T1 to T2 were computed (false discovery rate corrected).

## **Relationship to clinical outcomes**

Next, we tested for associations between rsfMRI results and clinical variables. Pearson correlations (Bonferroni corrected) were computed between rsfMRI alterations (T1acu vs. HCacu and delta T2-T1) and BMI-SDS, leptin, total scores on EDE, EDI-2 and BDI-2, the time between eating disorder onset and inpatient admission (T1acu) as well as the time from T1 to T2 (delta T2-T1).

## **Effects of grey matter volume on rsfMRI alterations**

To evaluate the impact of GMV on rsfMRI alterations, voxel-wise GMV was averaged for each cluster- or subnetwork from resting-state analyses and compared between groups using ANCOVAs or paired *t*-tests where appropriate. To evaluate influences of GMV changes on NBS results, group comparisons were recomputed after GMV was regressed out of the averaged network FC (separately for acute and recovered cohorts). For voxel-wise rsfMRI measures, individual GMV was regressed out at each voxel included in significant clusters. Cluster values were then averaged and compared between groups. To assess the impact of GMV correction on the magnitude of resting-state group differences, Cohen's *d* values (with Hedge's *g* correction) were computed for all significant rsfMRI measures before and after controlling for GMV (aside with respective GMV effect sizes).

## Results

### 230 Demographic and clinical sample characteristics

AN and corresponding HC did not differ regarding age. In cohort 1 (adolescents), AN showed higher verbal IQ compared to HC. Patients from the two study cohorts were comparable in regard to age at ED onset as well as age and BMI-SDS at first inpatient admission. As expected, patients with AN at T1 showed significantly lower BMI (-SDS) and  
235 leptin levels and higher scores on EDE, EDI-2 and BDI-2. Average BMI increase during inpatient treatment was  $20.8 \pm 9.5\%$ . T3rec patients exhibited elevated EDI-2 scores (Table 1; tables S1 and S2).

### Parcellation-based results

Using NBS, we identified significant differences between T1acu and HCacu and between  
240 T1acu and T2acu (Figures 1A and C; figure S1, table S5). Included connections were largely decreased for T1acu constituting a widespread network across the whole brain. T2acu as well as T3rec patients did not differ from HC. Post-hoc analyses based on T1acu findings revealed smaller but significant FC reduction for T2acu but not for T3rec (Figures 1E and F; table S6).

245 Left anterior superior frontal gyrus (SFG; T1acu vs. HCacu subnetwork; figure S2A) and left insular cortex (T1acu vs. T2acu subnetwork; figure S2B) displayed the largest decreases in node degree. Using these seeds, we found decreased FC for T1acu between left SFG and ROIs in the left medial temporal gyrus (MTG) and right calcarine sulcus as well as between left insula and bilateral medial frontal and left medial orbitofrontal cortex  
250 (Figures 1B and D; table S5). NBS results were largely similar when additionally controlling for FWD, IQ, admission-scan-delay and BMI-SDS, when excluding participants taking psycho-active medication or when using non-parametric statistics (tables S7-S12).

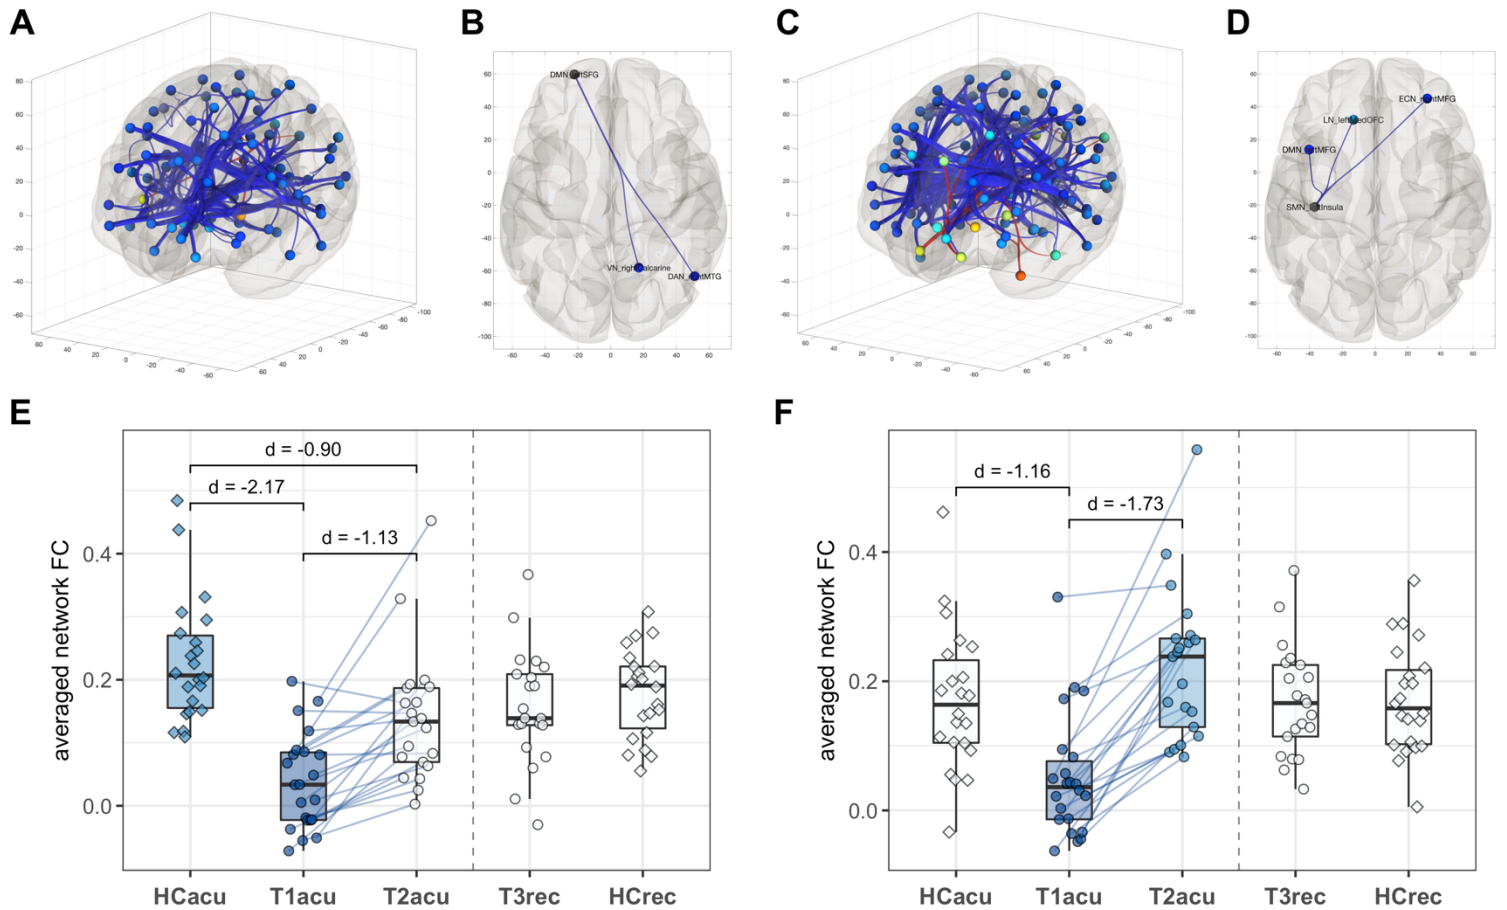

### Figure 1: Network Based Statistics

A: NBS subnetwork resulting from T1acu vs. HCacu comparison. B: Seed-to-ROI: Within the T1acu vs. HCacu subnetwork, functional connectivity (FC) between left superior frontal gyrus (seed) and right calcarine sulcus/ middle temporal gyrus shows the strongest reduction ( $p < 0.05/115$ ). C: NBS subnetwork resulting from T1acu vs. T2acu comparison. D: Seed-to-ROI: Within the T1acu vs. T2acu subnetwork, FC between left insula (seed) and prefrontal regions (middle frontal and orbitofrontal gyri) shows the strongest reduction. E: Post-hoc comparison of averaged T1acu < HCacu subnetwork FC. F: Post-hoc comparison of averaged T1acu < T2acu subnetwork FC.

Boxplot figures represent post-hoc comparisons of results from T1acu < HCacu and T1acu < T2acu contrasts. Each box represents one group, the scatter points represent single subjects (AN-subjects as circles, HC-subjects as squares). Blue lines indicate matching T1acu or T2acu values of each acute AN subject. The groups involved in the original, "primary", comparisons are colored to highlight circular statistical tests. Only groups within each study cohort were compared to each other, the dashed line separates the cohorts. Significant group comparisons (Bonferroni-corrected) are marked with brackets and complemented by corresponding effect sizes (Cohen's *d*, Hedge's *g* corrected).

## Voxel-wise results

255 In pairwise comparisons, significant differences were observed for all voxel-wise resting-state measures for T1acu < HCacu and T1acu < T2acu contrasts (Figures 2A, 3A and 4A; table S13). No other contrasts were significant. T1acu patients exhibited reduced GC in bilateral prefrontal regions in comparison to HC and in the right insula relative to T2acu (Figure 2A). In both contrasts, GC was reduced in bilateral sensorimotor areas. LC was  
260 reduced in T1acu in bilateral sensorimotor areas, right SFG and bilateral precuneus relative to HCacu and in bilateral sensorimotor, right fusiform and left MTG areas relative to T2acu (Figure 3A). We found a significant interaction in the medial posterior frontal cortex for LC comparing T1acu and T3rec patients relative to respective HC (Figure 3A). Fractional ALFF was reduced for T1acu in bilateral precuneus and calcarine sulcus  
265 compared to T2acu and HCacu, in left parietal regions relative to HCacu and in left MTG relative to T2acu (Figure 4A).

From all identified cluster per modality, (right) prefrontal GC and LC and left parietal fALFF showed the largest effect sizes (Figures 2B, 3B, 4B and 5C; table S6). In post-hoc group comparisons of these clusters, right prefrontal LC and left parietal fALFF were also  
270 reduced in T2acu compared to HCacu (Figures 3B and 4B; table S6). All results remained largely similar when controlling for FWD, IQ and admission-scan-delay or when excluding medicated participants (tables S14, S8, S9, S11). When controlling for BMI-SDS in the T1acu < HCacu contrast, only alterations in prefrontal GC and LC and left parietal fALFF remained significant; in the T1acu < T2acu contrast, all differences, except for  
275 sensorimotor GC, remained significant (table S10). Outliers in the data did not have significant impact on group effects (table S12).



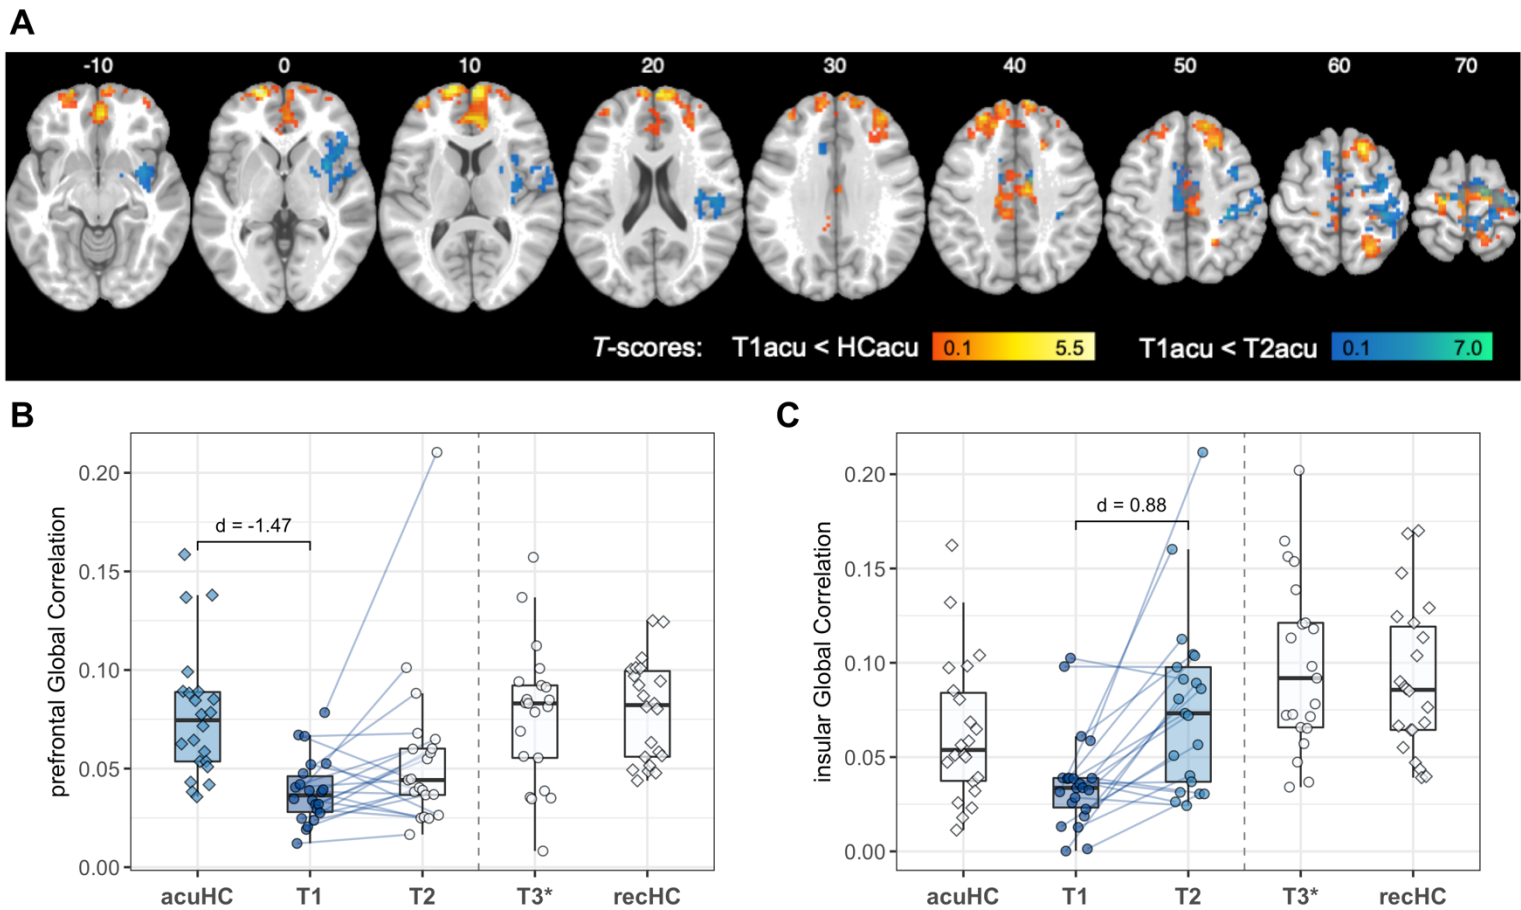

### Figure 2: Global Correlation

A: Clusters of significantly reduced Global Correlation (GC) in T1acu patients compared to HCacu (red-yellow) and compared to T2acu (blue-green). Colour brightness reflects  $T$ -value size at a given voxel. B and C show GC clusters with the largest effect sizes in post-hoc comparisons: B: Prefrontal GC (T1acu < HCacu). C: Right insula GC (T1acu < T2acu).

For general descriptions of the boxplot diagrams, refer to the legend of Figure 1.

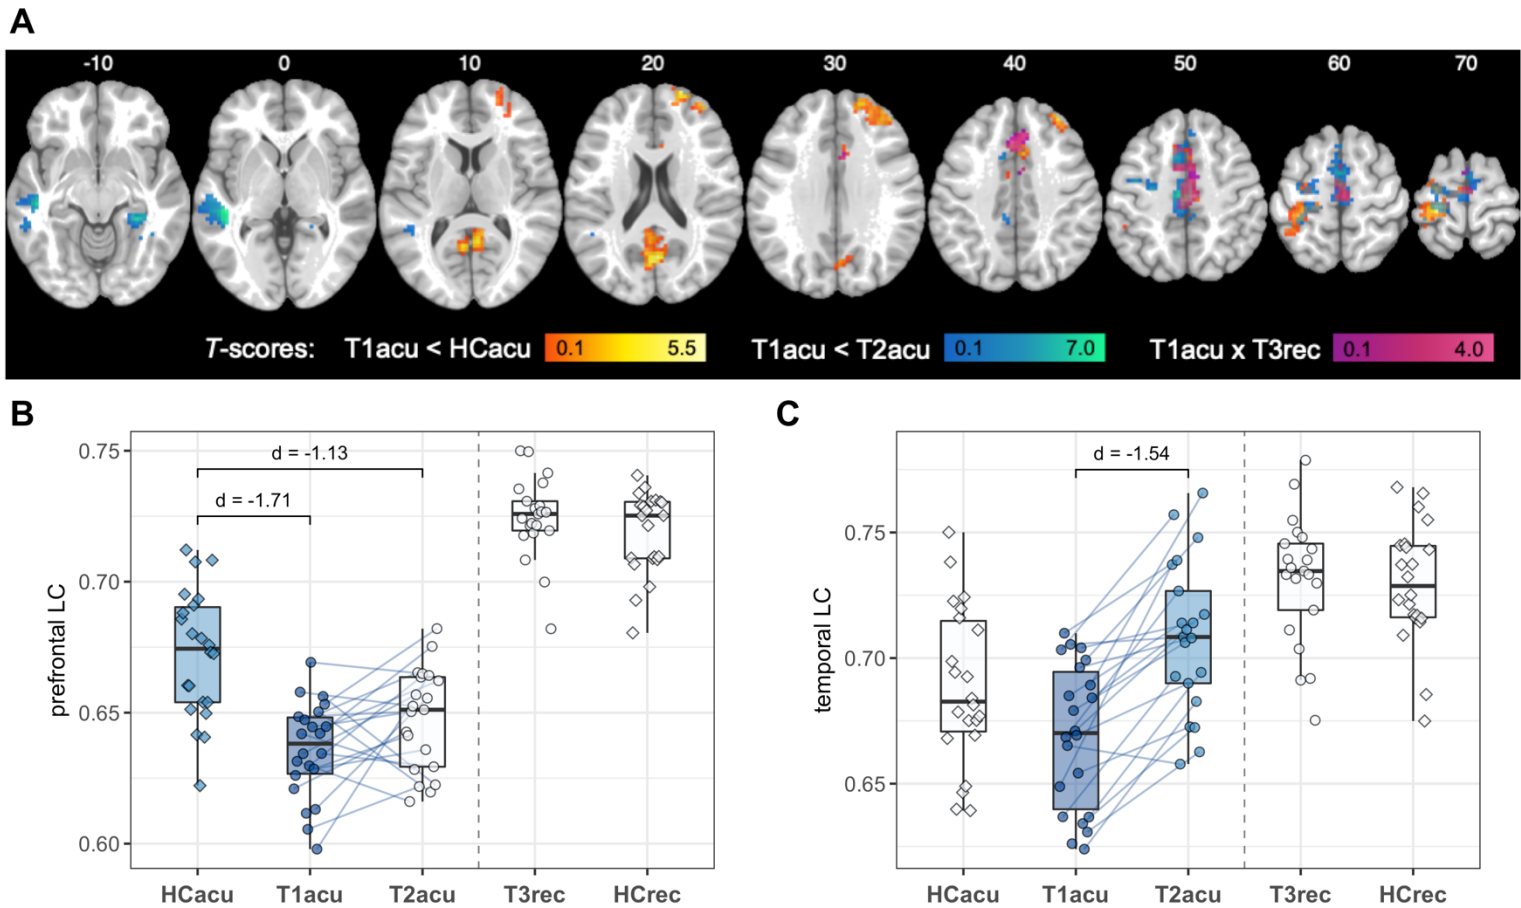

### Figure 3: Integrated Local Correlation

A: Clusters of significantly reduced Integrated Local Correlation (LC) in T1acu patients compared to HCacu (red-yellow) and compared to T2acu (blue-green). Results from T1acu < HCacu x T3rec > HCrec contrast are displayed in purple. Colour brightness reflects *T*-value size at a given voxel. B and C show LC clusters with the largest effect sizes in post-hoc comparisons: B: LC in right superior frontal gyrus (T1acu < HCacu). C: LC in left middle temporal gyrus (T1acu < T2acu). For general descriptions of the boxplot diagrams, refer to the legend of Figure 1.

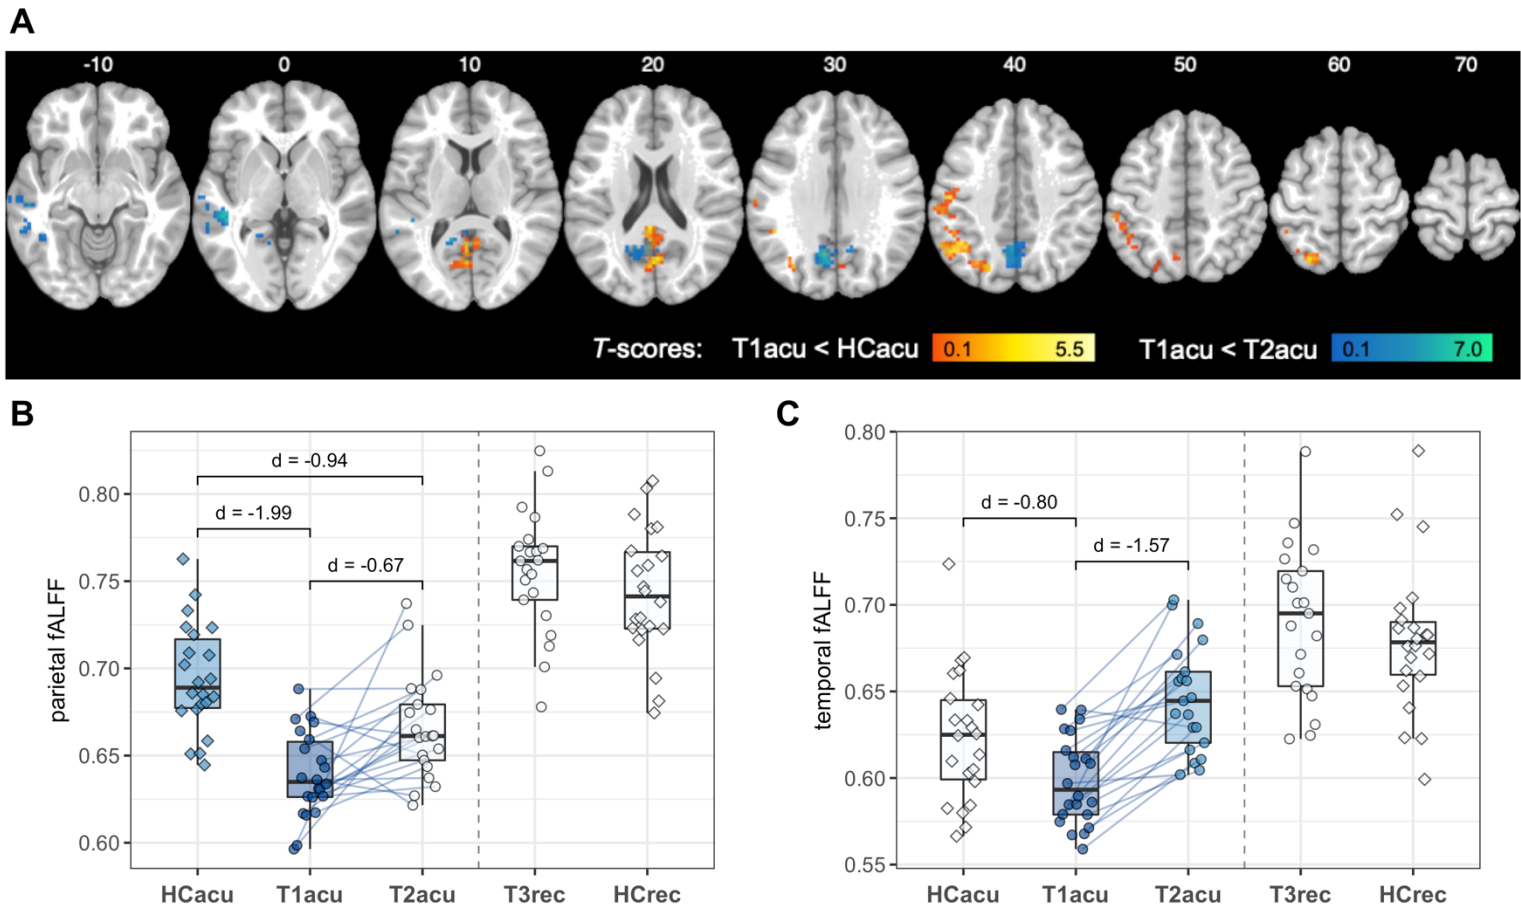

#### Figure 4: fractional Amplitude of Low Frequency Fluctuations

A: Clusters of significantly reduced fractional Amplitude of Low Frequency Fluctuations (fALFF) in T1acu patients compared to HCacu (red-yellow) and compared to T2acu (blue-green). Colour brightness reflects T-value size at a given voxel. B and C show fALFF clusters with the largest effect sizes in post-hoc comparisons: B: left parietal fALFF (T1acu < HCacu). C: fALFF in left middle temporal gyrus (T1acu < T2acu).

For general descriptions of the boxplot diagrams, refer to the legend of Figure 1.

## 280 **Correlations among rsfMRI measures**

Considering the multitude of identified alterations, we explored which of the observed rsfMRI changes are related to each other using correlation analyses. We found strong positive correlations between measures capturing global (NBS, GC) respectively local (LC, fALFF) resting-state characteristics and between topologically close alterations obtained  
285 by different methods (e.g. GC and LC in prefrontal or motor areas). Changes in rsfMRI measures from T1 to T2 correlated strongly across all measures, except for T1acu > HCacu and T1acu > T2acu network FC and prefrontal LC (Figure 5A).

### **Relationship to clinical outcomes**

No correlations between rsfMRI results and clinical variables remained significant after  
290 correction for multiple comparisons (table S15). At an uncorrected  $p < 0.05$ , in patients with acute AN T1acu < HCacu network FC was positively associated with EDI-2 scores. Bilateral precuneal LC was positively correlated with BMI-SDS, EDI-2 and BDI-2 in patients with acute AN. Changes in right fusiform LC and left temporal fALFF correlated positively with time from T1 to T2 (Figure 5B). Given the unexpected direction of  
295 correlations with global ED severity scores, we performed additional exploratory correlation analyses that suggested strongest correlations between FC changes and EDI-2 subscales such as maturity fear and social insecurity rather than core eating behavior abnormality subscales (supplementary results, figure S3).

### **Effects of grey matter volume on rsfMRI alterations**

300 GMV was significantly reduced in acute AN in all rsfMRI clusters and networks (Figure 5C; table S16). When regressing GMV out of voxel-wise GC, LC and fALFF maps or averaged network FC, group differences and corresponding effects sizes remained largely

unchanged for all measures (Figure 5C; table S17). GMV did not correlate with any of the rsfMRI measures (table S18).

305

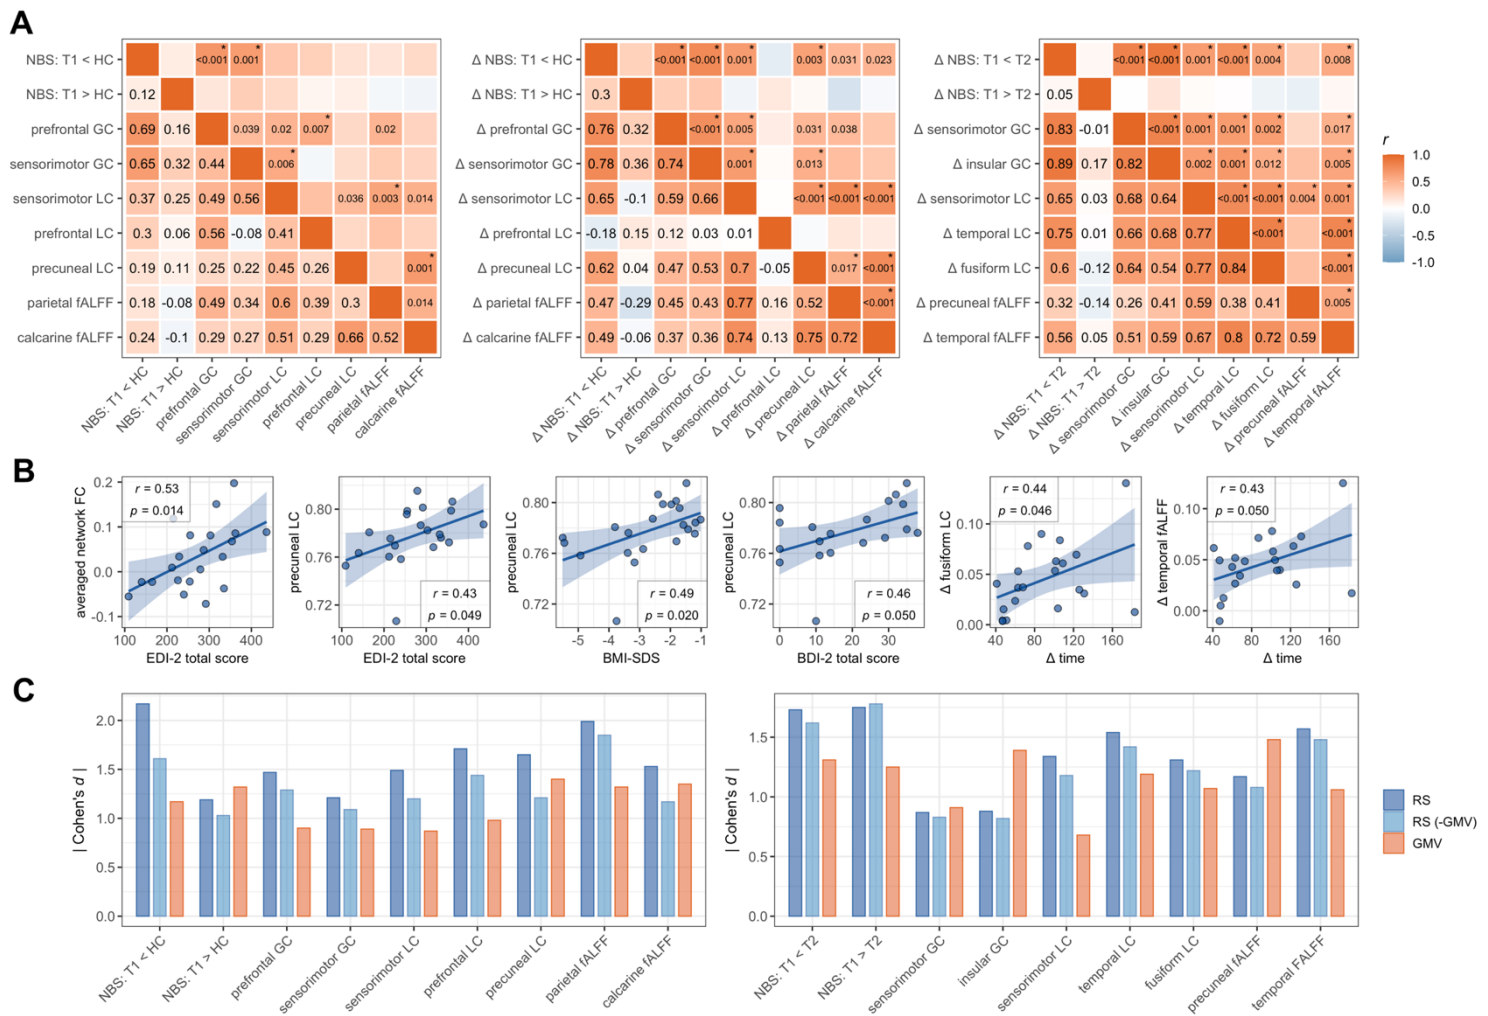

**Figure 5: Correlations among resting-state measures and with clinical outcome; Effect sizes of resting-state group comparisons with and without controlling for voxel-wise grey matter volume**

A: Left: Heatmap representing correlations of rsfMRI results from T1acu vs. HCacu comparison across resting-state measures in the T1acu group. Middle: Correlations between T1-T2-changes (“delta”) in rsfMRI results from T1acu vs. HCacu comparisons. Right: Correlations between T1-T2-changes in rsfMRI results from T1acu vs. T2acu comparisons. Colors of single squares represent the Pearson correlation coefficient  $r$ . The left lower triangle shows Pearson's  $r$  values, the right upper triangle shows associated  $p$ -values (if  $p > 0.05$ ). \* Correlations that remained significant after correcting for the false discovery rate (Benjamini-Hochberg procedure). B: 1 - 4: Associations between results from T1acu vs. HCacu rsfMRI comparisons and clinical variables in the acute AN group. 5 & 6: Associations between changes in resting-state measures and changes in clinical variables from T1 to T2. Since no correlation survived Bonferroni-correction, correlations have to be considered exploratory. Pearson's  $r$  and uncorrected  $p$ -values are shown. Scatter points represent patients with acute AN at T1, respectively differences between T1 and T2 (“delta”). Blue lines display the fitted linear regression function, blue areas the corresponding 95% confidence interval. C: Effect sizes (Cohen's  $d$ , Hedge's  $g$  corrected) from post-hoc comparisons of resting-state measures (RS), resting-state measures after voxel-wise regression of grey matter volume (RS-GMV) and grey matter volume (GMV). Left: T1acu vs. HCacu; right: T1acu vs. T2acu comparisons.

NBS = Network Based Statistics; GC = Global Correlation; LC = Integrated Local Correlation; fALFF = fractional Amplitude of Low Frequency Fluctuations; FC = functional connectivity; EDI-2 = Eating Disorder Inventory 2; BMI-SDS = body morph index – standard deviation score; EDE = Eating Disorder Examination; T1 = T1acu; T2 = T2acu; HC = HCacu.

## Discussion

We systematically explore whole-brain rsfMRI alterations in acute, short-term and long-term recovered, adolescent-onset AN. In acute patients, we find spatially widespread  
310 decreases of local and global FC and local activity measures. These alterations are independent of underlying GMV and normalize largely with short-term weight restoration to being absent in the long-term recovered group.

In line with several previous publications, we find largely decreased intra- and interregional rsfMRI measures in acute AN in bilateral prefrontal, sensorimotor, left  
315 parietal, left temporal, bilateral precuneal and insular regions (Ehrlich et al., 2015; Favaro et al., 2012; Gaudio et al., 2015, 2018; Geisler et al., 2016; Haynos et al., 2019; Kullmann et al., 2014; Phillipou et al., 2016; Scaife et al., 2017; Seidel et al., 2019). In contrast to some previous studies, we do not find increases of intraregional (Seidel et al., 2019) or interregional FC and activity (Biezonski et al., 2016; Boehm et al., 2014; Cha et al., 2016;  
320 Lee et al., 2014; Uniacke et al., 2019). This discrepancy may be due to differences in sample size, methodology as well as in most cases' shorter illness duration and younger age of our sample (table S19).

We find an almost complete normalization of all rsfMRI alterations after refeeding therapy. These findings are in line with results of Cha et al. (2016) and are further  
325 supported by similar conclusions from longitudinal task-based fMRI (Decker et al., 2015; Doose et al., 2020) as well as structural (brain gyri-fication) studies (Bernardoni et al., 2018). Moreover, the lack of differences between long-time recovered AN and HC in our study further supports the notion that the here identified sizeable rsfMRI alterations may constitute temporal, presumably starvation-related, state effects of the disorder.  
330 Differences to previous research indicating persistent alterations in varying brain

networks in short- (Uniacke et al., 2019) and long-term recovered AN (Boehm et al., 2016; Cowdrey et al., 2014; Favaro et al., 2012; Scaife et al., 2017) may be due to the longer average recovery time ( $5.3 \pm 3$  years) and the considerably shorter illness durations in our cohorts (tables S20, S21). This further underlines the importance of early  
335 identification and treatment of AN during adolescent age (Zipfel et al., 2015).

Whereas underweight-related GMV decreases in AN were consistently shown (Seitz et al., 2014, 2016), the dissociation between functional (resting-state) and structural alterations has not been systematically addressed. Our results are supported by preliminary data suggesting decreased function-structure relation (Seidel et al., 2019)  
340 and GMV-independency of resting-state alterations in AN (Scaife et al., 2017). The finding of a global reduction in FC, the normalization of rsfMRI alterations with recovery and the absence of robust clinical correlations support the notion of rsfMRI alterations being starvation-related phenomena. The missing relationship between resting-state recovery and increasing BMI as well as GMV changes during inpatient treatment may possibly be  
345 explained by a mechanism of recovery proceeding faster than weight-restoration such as, for example, short-term changes in energy-supply (Al-Zubaidi et al., 2018, 2020). The near absence of resting-state alterations combined with persisting reduced bodyweight and elevated ED psychopathology at inpatient discharge supports this hypothesis. However, considering the moderate sample size in our study, AN psychopathology may  
350 still have an independent influence on recovery of resting-state brain functioning.

Alterations of bilateral prefrontal and left parietal rsfMRI measures display the largest effect sizes in acute AN in our study. Both regions play a central role in altered cognitive control associated with AN-pathophysiology as indicated by brain imaging, theoretical and behavioral research (Gaudio et al., 2016; Steward et al., 2018; Kaye et al.,  
355 2013; Fuglset, 2019). Alterations in parietal regions in AN have repeatedly been linked to



distorted body image (Gaudio & Quattrocchi, 2012). Simultaneously reduced local and global connectivity in prefrontal brain regions point to a common biological background (Deco et al., 2014; Vuksanović & Hövel, 2014). In line with that, we detected significant associations between topologically close alterations in different measures and between  
360 measures capturing local, respectively global rsfMRI characteristics. In contrast, correlational analyses between changes from T1 to T2 show a much denser pattern of significant correlations across all measures. These findings indicate a global trend of recovery with no notable emphasis on certain resting-state alterations or specific metrics.

As stated above, we do not find correlations between rsfMRI and clinical measures  
365 surviving correction for multiple comparisons. Considering the small sample size and the adopted exploratory approach this is not surprising. Nonetheless, we find some preliminary evidence for associations between rsfMRI and clinical measures including an unexpected positive correlation between ED severity scales and FC in acute AN that would require replication in larger samples.

### 370 **Limitations**

A major limitation of the study is the relatively small sample size of the cohort evaluated here preventing detection of potentially weaker rsfMRI alterations and limiting the generalizability of our findings (Poldrack et al., 2017). Furthermore, the AN-, respectively starvation-related differences of pubertal status between acute patients and controls and  
375 the broad age range of the acute patient group could influence rsfMRI group differences (Petersen et al., 2014; Faghiri et al., 2019). Despite these limitations, considering the lack of previous longitudinal rsfMRI studies in AN, our results provide a basis for future hypothesis-driven and replication studies to build upon.

## Conclusion

380 We provide novel insight into extent and recovery of resting-state brain functioning during the clinical course of AN. Resting-state alterations in AN are independent of GMV and are compatible with starvation-related phenomena indicating their potential as state-markers of the disorder. Consistent with clinical findings, brain regions previously associated with cognitive control and body image disturbance show the most pronounced  
385 alterations in acute AN. Absence of these alterations in our fully recovered group with relatively short illness duration underlines the importance of early identification and treatment in AN.

## Acknowledgements

The study was supported by the Swiss Anorexia Nervosa foundation (cohort 2; Grant  
390 number: 53-15). A preprint of this manuscript is available on medRxiv  
(<https://doi.org/10.1101/2020.06.21.20135566>).

## Disclosures

JD is a former employee and received consultancy fees on another topic from F. Hoffmann-  
395 La Roche AG. All authors report no conflicts of interest with respect to the work presented  
in this study.

## Author's contribution

LDL performed all analyses and wrote the manuscript with support of JD and GvP. LDL,  
400 KK, SBE, JS and JD designed the overall study. JO, KB, LS and LDL conducted the clinical  
studies and gathered the data under supervision of JS and KK. All authors reviewed and  
commented on the manuscript.

## References

- 405 Ackenheil, M., Stotz, G., & Dietz-Bauer, R. (1999). *Mini International Neuropsychiatric Interview. German Version 5.0.0, DSM-IV*. Psychiatrische Universitätsklinik München.
- Al-Zubaidi, A., Heldmann, M., Mertins, A., Jauch-Chara, K., & Münte, T. F. (2018). Influences of Hunger, Satiety and Oral Glucose on Functional Brain Connectivity: A Multimethod Resting-State fMRI Study. *Neuroscience*, *382*, 80–92.  
410 <https://doi.org/10.1016/j.neuroscience.2018.04.029>
- Al-Zubaidi, A., Iglesias, S., Stephan, K. E., Buades-Rotger, M., Heldmann, M., Nolde, J. M., Kirchner, H., Mertins, A., Jauch-Chara, K., & Münte, T. F. (2020). Effects of hunger, satiety and oral glucose on effective connectivity between hypothalamus and insular cortex. *NeuroImage*, *217*, 116931. <https://doi.org/10.1016/j.neuroimage.2020.116931>
- 415 American Psychiatric Association. (2013). *Diagnostic and statistical manual of mental disorders* (5.). American Psychiatric Publishing.
- Bernardoni, F., King, J. A., Geisler, D., Birkenstock, J., Tam, F. I., Weidner, K., Roessner, V., White, T., & Ehrlich, S. (2018). Nutritional Status Affects Cortical Folding: Lessons Learned From Anorexia Nervosa. *Biological Psychiatry*, *84*(9), 692–701.  
420 <https://doi.org/10.1016/j.biopsych.2018.05.008>
- Biezonski, D., Cha, J., Steinglass, J., & Posner, J. (2016). Evidence for Thalamocortical Circuit Abnormalities and Associated Cognitive Dysfunctions in Underweight Individuals with Anorexia Nervosa. *Neuropsychopharmacology*, *41*(6), 1560–1568.  
<https://doi.org/10.1038/npp.2015.314>
- 425 Boehm, I., Geisler, D., King, J. A., Ritschel, F., Seidel, M., Deza Araujo, Y., Petermann, J., Lohmeier, H., Weiss, J., Walter, M., Roessner, V., & Ehrlich, S. (2014). Increased resting state functional connectivity in the fronto-parietal and default mode network in anorexia nervosa. *Frontiers in Behavioral Neuroscience*, *8*, 346. <https://doi.org/10.3389/fnbeh.2014.00346>

- Boehm, I., Geisler, D., Tam, F., King, J. A., Ritschel, F., Seidel, M., Bernardoni, F., Murr, J., Goschke, T.,  
430 Calhoun, V. D., Roessner, V., & Ehrlich, S. (2016). Partially restored resting-state functional  
connectivity in women recovered from anorexia nervosa. *Journal of Psychiatry &  
Neuroscience*, *41*(6), 377–385. <https://doi.org/10.1503/jpn.150259>
- Cha, J., Ide, J. S., Bowman, F. D., Simpson, H. B., Posner, J., & Steinglass, J. E. (2016). Abnormal  
reward circuitry in anorexia nervosa: A longitudinal, multimodal MRI study. *Human Brain  
435 Mapping*, *37*(11), 3835–3846. <https://doi.org/10.1002/hbm.23279>
- Cowdrey, F. A., Filippini, N., Park, R. J., Smith, S. M., & McCabe, C. (2014). Increased resting state  
functional connectivity in the default mode network in recovered anorexia nervosa.  
*Human Brain Mapping*, *35*(2), 483–491. <https://doi.org/10.1002/hbm.22202>
- Damoiseaux, J. S., Rombouts, S. A. R. B., Barkhof, F., Scheltens, P., Stam, C. J., Smith, S. M., &  
440 Beckmann, C. F. (2006). Consistent resting-state networks across healthy subjects.  
*Proceedings of the National Academy of Sciences*, *103*(37), 13848–13853.  
<https://doi.org/10.1073/pnas.0601417103>
- Decker, J. H., Figner, B., & Steinglass, J. E. (2015). On Weight and Waiting: Delay Discounting in  
Anorexia Nervosa Pretreatment and Posttreatment. *Biological Psychiatry*, *78*(9), 606–614.  
445 <https://doi.org/10.1016/j.biopsych.2014.12.016>
- Deco, G., Ponce-Alvarez, A., Hagmann, P., Romani, G. L., Mantini, D., & Corbetta, M. (2014). How  
local excitation-inhibition ratio impacts the whole brain dynamics. *The Journal of  
Neuroscience*, *34*(23), 7886–7898. <https://doi.org/10.1523/JNEUROSCI.5068-13.2014>
- Deshpande, G., LaConte, S., Peltier, S., & Hu, X. (2009). Integrated local correlation: A new measure  
450 of local coherence in fMRI data. *Human Brain Mapping*, *30*(1), 13–23.  
<https://doi.org/10.1002/hbm.20482>
- Doose, A., King, J. A., Bernardoni, F., Geisler, D., Hellerhoff, I., Weinert, T., Roessner, V., Smolka, M.  
N., & Ehrlich, S. (2020). Strengthened Default Mode Network Activation During Delay  
Discounting in Adolescents with Anorexia Nervosa After Partial Weight Restoration: A

- 455            Longitudinal fMRI Study. *Journal of Clinical Medicine*, 9(4), 900.  
                 <https://doi.org/10.3390/jcm9040900>
- Dukart, J., Sambataro, F., & Bertolino, A. (2017). Distinct Role of Striatal Functional Connectivity and Dopaminergic Loss in Parkinson's Symptoms. *Frontiers in Aging Neuroscience*, 9, 151.  
<https://doi.org/10.3389/fnagi.2017.00151>
- 460            Ehrlich, S., Lord, A. R., Geisler, D., Borchardt, V., Boehm, I., Seidel, M., Ritschel, F., Schulze, A., King, J. A., Weidner, K., Roessner, V., & Walter, M. (2015). Reduced functional connectivity in the thalamo-insular subnetwork in patients with acute anorexia nervosa. *Human Brain Mapping*, 36(5), 1772–1781. <https://doi.org/10.1002/hbm.22736>
- Eklund, A., Nichols, T. E., & Knutsson, H. (2016). Cluster failure: Why fMRI inferences for spatial  
465            extent have inflated false-positive rates. *Proceedings of the National Academy of Sciences*, 113(28), 7900–7905. <https://doi.org/10.1073/pnas.1602413113>
- Faghiri, A., Stephen, J. M., Wang, Y.-P., Wilson, T. W., & Calhoun, V. D. (2019). Brain Development Includes Linear and Multiple Nonlinear Trajectories: A Cross-Sectional Resting-State Functional Magnetic Resonance Imaging Study. *Brain Connectivity*, 9(10), 777–788.  
470            <https://doi.org/10.1089/brain.2018.0641>
- Favaro, A., Santonastaso, P., Manara, R., Bosello, R., Bommarito, G., Tenconi, E., & Di Salle, F. (2012). Disruption of Visuospatial and Somatosensory Functional Connectivity in Anorexia Nervosa. *Biological Psychiatry*, 72(10), 864–870.  
<https://doi.org/10.1016/j.biopsych.2012.04.025>
- 475            Fox, M., & Greicius, M. (2010). Clinical applications of resting state functional connectivity. *Frontiers in Systems Neuroscience*, 4(19). <https://doi.org/10.3389/fnsys.2010.00019>
- Friston, K. J., Williams, S., Howard, R., Frackowiak, R. S. J., & Turner, R. (1996). Movement-Related effects in fMRI time-series. *Magnetic Resonance in Medicine*, 35(3), 346–355.  
<https://doi.org/10.1002/mrm.1910350312>

- 480 Fuglset, T. S. (2019). Set-shifting, central coherence and decision-making in individuals recovered  
from anorexia nervosa: A systematic review. *Journal of Eating Disorders*, 7, 22.  
<https://doi.org/10.1186/s40337-019-0251-5>
- Gaudio, S., Olivo, G., Beomonte Zobel, B., & Schioth, H. B. (2018). Altered cerebellar-insular-  
parietal-cingular subnetwork in adolescents in the earliest stages of anorexia nervosa: A  
485 network-based statistic analysis. *Translational Psychiatry*, 8(1), 127.  
<https://doi.org/10.1038/s41398-018-0173-z>
- Gaudio, S., Piervincenzi, C., Beomonte Zobel, B., Romana Montecchi, F., Riva, G., Carducci, F., &  
Cosimo Quattrocchi, C. (2015). Altered resting state functional connectivity of anterior  
cingulate cortex in drug naïve adolescents at the earliest stages of anorexia nervosa.  
490 *Scientific Reports*, 5(1), 10818. <https://doi.org/10.1038/srep10818>
- Gaudio, S., & Quattrocchi, C. C. (2012). Neural basis of a multidimensional model of body image  
distortion in anorexia nervosa. *Neuroscience and Biobehavioral Reviews*, 36(8), 1839–  
1847. <https://doi.org/10.1016/j.neubiorev.2012.05.003>
- Gaudio, S., Wiemerslage, L., Brooks, S. J., & Schioth, H. B. (2016). A systematic review of resting-  
495 state functional-MRI studies in anorexia nervosa: Evidence for functional connectivity  
impairment in cognitive control and visuospatial and body-signal integration.  
*Neuroscience and Biobehavioral Reviews*, 71, 578–589.  
<https://doi.org/10.1016/j.neubiorev.2016.09.032>
- Geisler, D., Borchardt, V., Lord, A. R., Boehm, I., Ritschel, F., Zwipp, J., Clas, S., King, J. A., Wolff-  
500 Stephan, S., Roessner, V., Walter, M., & Ehrlich, S. (2016). Abnormal functional global and  
local brain connectivity in female patients with anorexia nervosa. *Journal of Psychiatry &  
Neuroscience*, 41(1), 6–15. <https://doi.org/10.1503/jpn.140310>
- German K-SADS-Workgroup. (2001). *Kiddie-Sads-Present and Lifetime Version (K-SADS-PL),  
erweitert um ICD-10-Diagnostik*. Klinik für Psychiatrie und Psychotherapie der Kindes-  
505 und Jugendalters.

Hautzinger, M., Keller, F., & Kühner, C. (2009). *Beck-Depressions-Inventar: Revised*. Pearson.

Haynos, A. F., Hall, L. M. J., Lavender, J. M., Peterson, C. B., Crow, S. J., Klimes-Dougan, B., Cullen, K.

R., Lim, K. O., & Camchong, J. (2019). Resting state functional connectivity of networks associated with reward and habit in anorexia nervosa. *Human Brain Mapping, 40*, 652–

510 662. <https://doi.org/10.1002/hbm.24402>

Hebebrand, J., Muller, T. D., Holtkamp, K., & Herpertz-Dahlmann, B. (2007). The role of leptin in anorexia nervosa: Clinical implications. *Molecular Psychiatry, 12*(1), 23–35.

<https://doi.org/10.1038/sj.mp.4001909>

Hemmelmann, C., Brose, S., Vens, M., Hebebrand, J., & Ziegler, A. (2010). Perzentilen des Body-

515 Mass-Index auch für 18- bis 80-Jährige? Daten der Nationalen Verzehrsstudie II. *Deutsche Medizinische Wochenschrift, 135*(17), 848–852. <https://doi.org/10.1055/s-0030-1253666>

Hilbert, A., Tuschen-Caffier, B., & Ohms, M. (2004). Eating Disorder Examination: Deutschsprachige Version des strukturierten Essstörungsinterviews. *Diagnostica, 50*(2),

520 98–106. <https://doi.org/10.1026/0012-1924.50.2.98>

Kaye, W. H., Wierenga, C. E., Bailer, U. F., Simmons, A. N., & Bischoff-Grethe, A. (2013). Nothing tastes as good as skinny feels: The neurobiology of anorexia nervosa. *Trends in Neurosciences, 36*(2), 110–120. <https://doi.org/10.1016/j.tins.2013.01.003>

Kullmann, S., Giel, K. E., Teufel, M., Thiel, A., Zipfel, S., & Preissl, H. (2014). Aberrant network integrity of the inferior frontal cortex in women with anorexia nervosa. *NeuroImage: Clinical, 4*, 615–622. <https://doi.org/10.1016/j.nicl.2014.04.002>

525

Lee, S., Ran Kim, K., Ku, J., Lee, J. H., Namkoong, K., & Jung, Y. C. (2014). Resting-state synchrony between anterior cingulate cortex and precuneus relates to body shape concern in anorexia nervosa and bulimia nervosa. *Psychiatry Research, 221*(1), 43–48.

530 <https://doi.org/10.1016/j.psychres.2013.11.004>

Lehrl, S. (2005). *Mehrfachwahl-Wortschatz-Intelligenztest MWT-B* (5.). Spitta Verlag.



- Neuhauser, H., Schienkiewitz, A., Schaffrath-Rosario, A., Dortschy, R., & Kurth, B. M. (2013).  
*Referenzperzentile für anthropometrische Maßzahlen und Blutdruck aus der Studie zur  
Gesundheit von Kindern und Jugendlichen in Deutschland (KiGGS) (2.)*. Robert Koch-Institut.
- 535 Paul, T., & Thiel, A. (2005). *EDI-2. Eating Disorder Inventory-2*. Hogreve.
- Petersen, N., Kilpatrick, L. A., Goharзад, A., & Cahill, L. (2014). Oral contraceptive pill use and  
menstrual cycle phase are associated with altered resting state functional connectivity.  
*NeuroImage*, *90*, 24–32. <https://doi.org/10.1016/j.neuroimage.2013.12.016>
- Phillipou, A., Abel, L. A., Castle, D. J., Hughes, M. E., Nibbs, R. G., Gurvich, C., & Rossell, S. L. (2016).  
540 Resting state functional connectivity in anorexia nervosa. *Psychiatry Research:  
Neuroimaging*, *251*, 45–52. <https://doi.org/10.1016/j.psychresns.2016.04.008>
- Poldrack, R. A., Baker, C. I., Durnez, J., Gorgolewski, K. J., Matthews, P. M., Munafò, M. R., Nichols, T.  
E., Poline, J.-B., Vul, E., & Yarkoni, T. (2017). Scanning the horizon: Towards transparent  
and reproducible neuroimaging research. *Nature Reviews Neuroscience*, *18*(2), 115–126.  
545 <https://doi.org/10.1038/nrn.2016.167>
- Rolls, E. T., Huang, C.-C., Lin, C.-P., Feng, J., & Joliot, M. (2020). Automated anatomical labelling atlas  
3. *NeuroImage*, *206*, 116189. <https://doi.org/10.1016/j.neuroimage.2019.116189>
- Scaife, J. C., Godier, L. R., Filippini, N., Harmer, C. J., & Park, R. J. (2017). Reduced Resting-State  
Functional Connectivity in Current and Recovered Restrictive Anorexia Nervosa. *Frontiers  
550 in Psychiatry*, *8*, 30. <https://doi.org/10.3389/fpsy.2017.00030>
- Schaefer, A., Kong, R., Gordon, E. M., Laumann, T. O., Zuo, X.-N., Holmes, A. J., Eickhoff, S. B., & Yeo,  
B. T. T. (2018). Local-Global Parcellation of the Human Cerebral Cortex from Intrinsic  
Functional Connectivity MRI. *Cerebral Cortex*, *28*(9), 3095–3114.  
<https://doi.org/10.1093/cercor/bhx179>
- 555 Seidel, M., Borchardt, V., Geisler, D., King, J. A., Boehm, I., Pauligk, S., Bernardoni, F., Biemann, R.,  
Roessner, V., Walter, M., & Ehrlich, S. (2019). Abnormal Spontaneous Regional Brain  
Activity in Young Patients With Anorexia Nervosa. *Journal of the American Academy of*

*Child & Adolescent Psychiatry*, 58(11), 1104–1114.

<https://doi.org/10.1016/j.jaac.2019.01.011>

560 Seitz, J., Buhren, K., von Polier, G. G., Heussen, N., Herpertz-Dahlmann, B., & Konrad, K. (2014). Morphological changes in the brain of acutely ill and weight-recovered patients with anorexia nervosa. A meta-analysis and qualitative review. *Zeitschrift Für Kinder- Und Jugendpsychiatrie Und Psychotherapie*, 42(1), 7–17. <https://doi.org/10.1024/1422-4917/a000265>

565 Seitz, J., Herpertz-Dahlmann, B., & Konrad, K. (2016). Brain morphological changes in adolescent and adult patients with anorexia nervosa. *Journal of Neural Transmission (Vienna)*, 123(8), 949–959. <https://doi.org/10.1007/s00702-016-1567-9>

Steward, T., Menchon, J. M., Jimenez-Murcia, S., Soriano-Mas, C., & Fernandez-Aranda, F. (2018). Neural Network Alterations Across Eating Disorders: A Narrative Review of fMRI Studies.

570 *Current Neuropsychopharmacology*, 16(8), 1150–1163. <https://doi.org/10.2174/1570159x15666171017111532>

The jamovi project. (2020). *Jamovi* (1.2) [Computer software]. <https://www.jamovi.org>

Uniacke, B., Wang, Y., Biezonski, D., Sussman, T., Lee, S., Posner, J., & Steinglass, J. (2019). Resting-state connectivity within and across neural circuits in anorexia nervosa. *Brain and Behavior*, 9(1), e01205. <https://doi.org/10.1002/brb3.1205>

575 Vuksanović, V., & Hövel, P. (2014). Functional connectivity of distant cortical regions: Role of remote synchronization and symmetry in interactions. *NeuroImage*, 97, 1–8. <https://doi.org/10.1016/j.neuroimage.2014.04.039>

Whitfield-Gabrieli, S., & Nieto-Castanon, A. (2012). Conn: A functional connectivity toolbox for correlated and anticorrelated brain networks. *Brain Connectivity*, 2(3), 125–141. <https://doi.org/10.1089/brain.2012.0073>

580 Wickham, H. (2016). *ggplot2: Elegant Graphics for Data Analysis*. Springer-Verlag. <https://ggplot2.tidyverse.org>

- Zalesky, A., Fornito, A., & Bullmore, E. T. (2010). Network-based statistic: Identifying differences  
585 in brain networks. *Neuroimage*, 53(4), 1197–1207.  
<https://doi.org/10.1016/j.neuroimage.2010.06.041>
- Zipfel, S., Giel, K. E., Bulik, C. M., Hay, P., & Schmidt, U. (2015). Anorexia nervosa: Aetiology,  
assessment, and treatment. *Lancet Psychiatry*, 2(12), 1099–1111.  
[https://doi.org/10.1016/S2215-0366\(15\)00356-9](https://doi.org/10.1016/S2215-0366(15)00356-9)
- 590 Zou, Q.-H., Zhu, C.-Z., Yang, Y., Zuo, X.-N., Long, X.-Y., Cao, Q.-J., Wang, Y.-F., & Zang, Y.-F. (2008). An  
improved approach to detection of amplitude of low-frequency fluctuation (ALFF) for  
resting-state fMRI: fractional ALFF. *Journal of Neuroscience Methods*, 172(1), 137–141.  
<https://doi.org/10.1016/j.jneumeth.2008.04.012>
